# Supplementary material for: Overexpression of OsHMGB707, a High Mobility Group Protein, Enhances Rice Drought Tolerance by Promoting Stress-Related Gene Expression
Source: Front Plant Sci. 2021 Aug 5;12:711271. doi: 10.3389/fpls.2021.711271 (PMC8375505; doi:10.3389/fpls.2021.711271)
Supplement: Supplementary file 2 [file Table_1.XLSX]

## Sheet: Sheet1
Table S1 DEGs between OsHMGB707 OE plants and WT plants
Probe Set ID	p	FC (abs)	Regulation	Ensembl	annotation
Os.43929.1.S1_s_at	7.05249e-08	273.306	up	LOC_Os03g02470	expressed protein
Os.10038.1.S1_s_at	0.000332129	53.4418	up	LOC_Os05g36240	expressed protein
Os.10660.1.S1_at	1.20079e-05	49.7222	up	LOC_Os07g06834	expressed protein
Os.10266.1.S1_at	9.55185e-06	40.3438	up	LOC_Os03g43100	expressed protein
OsAffx.30014.1.S1_at	4.61257e-06	26.4487	up	BGIOSGA029749	hypothetical protein
Os.20614.3.S1_x_at	4.98921e-05	25.2656	up	LOC_Os01g36064	F-box protein interaction domain containing protein
Os.44418.1.S1_at	8.28138e-05	17.5314	up	LOC_Os07g11150	expressed protein
Os.4184.1.S1_at	9.97297e-05	16.6011	up	LOC_Os02g15350	dof zinc finger domain containing protein
Os.48948.1.S1_x_at	0.00017435	13.9317	up	BGIOSGA036482	hypothetical protein
OsAffx.28294.2.S1_x_at	0.000554056	13.167	up	LOC_Os07g05840	expressed protein
Os.20614.1.S1_at	5.27638e-05	9.76081	up	LOC_Os10g41838	F-box protein interaction domain containing protein, expressed
Os.50627.1.S1_at	1.05378e-05	9.44915	up	LOC_Os04g58050	expressed protein
Os.15854.1.S1_at	0.047637	9.43778	up	LOC_Os07g35940	beta-amylase, putative, expressed
Os.52093.1.S1_at	0.000212603	8.47734	up	LOC_Os09g31446	expressed protein
Os.22789.1.A1_at	0.000188728	8.10654	up	LOC_Os10g25850	nuclear transcription factor Y subunit
Os.8480.1.S1_at	7.98166e-05	7.21244	up	LOC_Os05g30700	expressed protein
Os.54358.1.S1_at	0.000227673	6.06315	up	LOC_Os11g17954	transposon protein
Os.10941.1.S1_at	8.43499e-05	5.05326	up	LOC_Os03g11614	OsMADS1 - MADS-box family gene with MIKCc type-box
OsAffx.29387.1.S1_at	1.6804e-06	4.95276	up	LOC_Os08g27870	EARLY flowering protein
Os.29043.1.S1_at	0.000324544	4.7237	up	LOC_Os01g49750	expressed protein
Os.53831.1.S1_at	7.94495e-05	4.51715	up	Os06g0685400	Conserved hypothetical protein
Os.54933.1.S1_at	0.000684524	4.45212	up	LOC_Os04g34490	nodulin, putative, expressed
OsAffx.19456.1.A1_at	0.0018672	4.37625	up	Os12g0113600	hypothetical protein
Os.4620.1.S1_at	0.00158203	4.21746	up	Os06g0318533	hypothetical protein
OsAffx.20707.5.S1_at	2.55182e-06	4.08245	up	LOC_Os05g18780	rpp14 family protein
Os.15829.1.S1_at	0.0394908	4.01451	up	LOC_Os02g10120	lipoxygenase
Os.53786.1.S1_at	0.00110771	3.98194	up	LOC_Os09g09540	transposon protein
Os.44486.1.S1_at	0.000288976	3.95689	up	LOC_Os07g05260	expressed protein
Os.48053.1.A1_at	0.0467443	3.89365	up	Os07g0146600	hypothetical protein
Os.16030.1.S1_at	0.00573432	3.87434	up	Os07g0142100	Cytochrome P450 family protein
Os.57052.1.S1_at	0.00271885	3.8521	up	LOC_Os03g04760	expressed protein
Os.34199.1.S1_at	0.000577755	3.65424	up	LOC_Os01g72630	expressed protein
Os.4766.1.S1_at	0.000778282	3.62301	up	LOC_Os10g28350	1,2-dihydroxy-3-keto-5-methylthiopentene dioxygenase protein
Os.34982.1.A1_x_at	0.000179222	3.36566	up	LOC_Os04g17660	rhodanese-like domain containing protein
OsAffx.4947.1.S1_at	0.0228069	3.34206	up	Os06g0473000	Conserved hypothetical protein
Os.12163.1.S1_at	0.00162073	3.26736	up	LOC_Os03g12510	non-symbiotic hemoglobin 2
OsAffx.25720.1.S1_at	0.0159579	3.24133	up	LOC_Os03g55460	expressed protein
Os.53419.1.S1_at	0.00130626	3.19336	up	LOC_Os02g43840	ethylene-responsive element-binding protein
OsAffx.31531.1.S1_s_at	0.00225151	3.13508	up	LOC_Os11g48060	laccase-22 precursor
OsAffx.26155.1.S1_x_at	0.000870457	3.12339	up	LOC_Os04g25960	expressed protein
Os.44418.2.S1_at	0.00285178	3.1066	up	LOC_Os02g03640	expressed protein
Os.6293.1.S1_at	0.000509312	3.10133	up	Os06g0656700	Conserved hypothetical protein
OsAffx.30780.1.S1_at	0.00114136	3.07855	up	LOC_Os11g02220	retrotransposon protein, putative, SINE subclass
Os.51227.1.S1_x_at	0.0067237	3.05338	up	LOC_Os04g27790	terpene synthase
OsAffx.27509.1.S2_s_at	0.00117387	3.04929	up	LOC_Os06g08380	1,3-beta-glucan synthase component domain containing protein
Os.11991.1.S1_at	0.00408338	2.97761	up	LOC_Os11g10520	dehydrogenase
Os.34142.1.S1_at	0.000215728	2.96217	up	LOC_Os01g07360	KIP1（CENP-E-like kinetochore protein）
Os.409.1.S1_at	0.0162298	2.95479	up	LOC_Os07g15460	metal transporter Nramp6
Os.12639.1.A1_at	0.00375852	2.95236	up	LOC_Os11g10710	protein kinase domain containing protein, expressed
Os.32889.1.S1_at	0.000136214	2.93393	up	LOC_Os07g03040	expressed protein
Os.27620.1.A1_at	1.01703e-05	2.897	up	LOC_Os11g11550	Disease resistance protein family protein
Os.53511.1.S1_at	0.0128587	2.87534	up	LOC_Os11g42850	expressed protein
Os.23174.1.S1_at	0.0107993	2.86975	up	LOC_Os08g14200	glycosyl hydrolases family 16
Os.51251.1.S1_at	0.000944786	2.8612	up	Os02g0459400	Conserved hypothetical protein
Os.51078.1.S1_at	0.00397724	2.85162	up	LOC_Os02g45450	dehydration-responsive element-binding protein,
Os.54726.1.S1_at	0.00189172	2.76316	up	LOC_Os09g31930	retrotransposon protein
Os.49762.1.S1_at	0.000266876	2.71042	up	LOC_Os02g36924	OsMADS27 - MADS-box family gene with MIKCc type-box
Os.23136.1.A1_s_at	5.1412e-05	2.67213	up	LOC_Os11g42930	expressed protein
OsAffx.31590.1.S1_at	8.51783e-05	2.66502	up	LOC_Os06g13700	hypothetical protein
Os.16030.1.S1_x_at	0.00306814	2.63641	up	Os03g0371400	Cytochrome P450 family protein
Os.45018.1.S1_x_at	0.0167198	2.63255	up	LOC_Os03g25500	cytochrome P450
Os.12201.2.S1_at	0.0257606	2.62543	up	LOC_Os09g27820	1-aminocyclopropane-1-carboxylate oxidase protein
Os.51375.1.S1_at	0.00637805	2.61518	up	Os11g0422000	Conserved hypothetical protein
OsAffx.15443.1.S1_at	0.00118067	2.57247	up	LOC_Os06g15750	NB-ARC domain containing protein
Os.53672.1.A1_at	3.16492e-06	2.54928	up	LOC_Os07g27350	atuA
OsAffx.30677.5.S1_x_at	0.0020835	2.50893	up	LOC_Os05g34490	expressed protein
Os.26430.1.A1_at	0.000481547	2.49734	up	LOC_Os12g07180	transposon protein
Os.12381.1.S1_s_at	0.0370296	2.45834	up	LOC_Os07g44250	dirigent, putative, expressed
Os.24051.2.S1_at	3.65988e-05	2.43343	up	LOC_Os04g33640	glycosyl hydrolases family 17
Os.47445.1.S1_at	0.00353508	2.41146	up	LOC_Os02g26210	flowering promoting factor-like 1,
Os.52124.1.S1_at	0.00241121	2.40523	up	LOC_Os11g35540	expressed protein
Os.4775.2.S1_at	0.000838916	2.38667	up	LOC_Os01g04370	hsp20/alpha crystallin family protein
Os.5711.1.S1_at	0.00636804	2.36086	up	LOC_Os01g32610	expressed protein
Os.7004.1.S1_at	0.0273055	2.35477	up	LOC_Os12g13340	expressed protein
Os.6083.1.S1_at	0.000759612	2.35178	up	LOC_Os11g41410	expressed protein
Os.51158.1.S1_at	0.00197135	2.34941	up	LOC_Os08g14190	flavonol sulfotransferase
Os.5591.1.S1_at	0.00301853	2.34582	up	LOC_Os07g02790	expressed protein
Os.13051.1.S1_at	0.000174915	2.32772	up	LOC_Os12g04980	DNA repair protein Rad51
Os.7525.1.S1_at	2.29621e-06	2.30406	up	LOC_Os01g73000	copine
Os.24397.1.S1_at	0.000101886	2.2352	up	LOC_Os12g42810	mov34/MPN/PAD-1 family protein
Os.32596.3.S1_x_at	0.00490272	2.23499	up	LOC_Os01g71624	expressed protein
Os.10468.1.S1_at	0.00142113	2.23292	up	LOC_Os03g51470	expressed protein
OsAffx.2947.1.S1_at	0.0190286	2.23142	up	LOC_Os02g43370	transposon protein
Os.37617.1.S1_at	0.000977739	2.21518	up	LOC_Os01g39860	1-aminocyclopropane-1-carboxylate oxidase protein
Os.41723.1.S1_at	0.000380699	2.21476	up	LOC_Os01g48620	expressed protein
OsAffx.8923.1.S1_at	0.00581606	2.20147	up	LOC_Os03g59190	retrotransposon protein
Os.51491.1.S1_at	0.0222463	2.19537	up	LOC_Os03g31730	expressed protein
OsAffx.25816.1.S1_at	0.0162202	2.18418	up	BGIOSGA012723	hypothetical protein
OsAffx.16737.1.S1_at	0.00369507	2.17197	up	Os11g0118400	Hypothetical protein.
Os.8582.1.S1_at	0.00933015	2.16648	up	LOC_Os08g14109	retrotransposon protein
OsAffx.24457.1.S1_at	0.0002059	2.14232	up	BGIOSGA006487	hypothetical protein
Os.35808.1.S1_at	0.00385241	2.10321	up	LOC_Os01g42190	heat shock protein DnaJ（21kd）
Os.50648.1.S1_at	0.00393931	2.08524	up	LOC_Os06g43880	prenyltransferase
OsAffx.13437.1.S1_at	0.000118102	2.08205	up	LOC_Os03g50280	GLTP domain containing protein
Os.9320.1.S1_at	0.000359069	2.07421	up	LOC_Os05g42190	NADPH-dependent FMN reductase domain containing protein
Os.8112.1.S1_at	0.0402231	2.07299	up	LOC_Os07g04990	oxidoreductase, aldo/keto reductase family protein
Os.50578.1.S1_x_at	0.0107274	2.06568	up	LOC_Os11g20239	expressed protein
Os.34624.1.S1_at	0.00165598	2.05996	up	LOC_Os03g38540	folic acid binding protein
OsAffx.27442.1.S1_at	0.0059362	2.05819	up	LOC_Os06g03670	dehydration-responsive element-binding protein
Os.8815.1.S1_at	0.00499592	2.05583	up	LOC_Os11g10510	dehydrogenase,
OsAffx.3754.1.S1_at	0.000697291	2.05445	up	LOC_Os04g09450	expressed protein
OsAffx.11993.2.S1_s_at	0.0103715	2.0511	up	BGIOSGA007283	ABC transporter
Os.35510.1.S1_at	0.000649599	2.04825	up	LOC_Os02g01220	rhodanese-like domain containing protein
Os.16903.1.A1_at	0.0068252	2.03021	up	LOC_Os05g06920	relA-SpoT like protein RSH4
Os.52428.2.S1_at	0.00125121	2.02753	up	LOC_Os06g43510	cytochrome P450 71D6
Os.26852.1.A1_at	0.0400314	2.00885	up	LOC_Os03g22634	terpene synthase
Os.51775.1.S1_at	0.0227559	2.00827	up	LOC_Os12g05210	expressed protein
Os.15285.1.S1_a_at	6.60202e-06	7.12956	down	LOC_Os01g27150	cullin, putative, expressed
OsAffx.25825.1.S1_at	0.0175854	6.96113	down	LOC_Os04g01810	terpene synthase, putative, expressed
Os.7108.1.S1_at	4.16092e-05	6.20159	down	LOC_Os02g37190	expressed protein
Os.34496.1.S1_at	0.0258962	5.47276	down	Os03g0830500	uncharacterized Cys-rich domain containing protein, putative, expressed
Os.57156.1.S1_at	0.000575915	4.3114	down	LOC_Os11g10800	dirigent, putative, expressed
OsAffx.27993.1.S1_at	0.00357	4.116	down	LOC_Os06g38710	expressed protein
Os.57054.1.S1_at	0.000261728	3.92657	down	LOC_Os02g17000	OsSub14 - Putative Subtilisin homologue, expressed
OsAffx.15407.1.S1_at	0.00722451	3.7774	down	LOC_Os06g13390	SAM dependent carboxyl methyltransferase, putative, expressed
Os.18628.1.S1_at	0.000309253	3.56807	down	Os08g0267900
OsAffx.20724.2.S1_s_at	0.00021194	3.52595	down	LOC_Os10g07010	3-ketoacyl-CoA synthase, putative, expressed
Os.7938.1.S1_at	0.0144944	3.38139	down	LOC_Os04g59190	peroxidase precursor, putative, expressed
Os.27793.1.S1_at	0.0195581	3.35788	down	LOC_Os02g14430	peroxidase precursor, putative, expressed
Os.11164.1.S1_at	0.0305892	3.32448	down	LOC_Os07g03279	SCP-like extracellular protein, expressed
Os.9544.1.A1_at	0.00181749	3.21619	down	LOC_Os07g07920	LTPL100 - Protease inhibitor/seed storage/LTP family protein precursor, expressed
Os.18981.1.S1_at	0.000397735	3.18313	down	LOC_Os07g18120	aldehyde oxidase, putative, expressed
OsAffx.14446.1.S1_s_at	0.0283859	3.11266	down	LOC_Os04g56910	transferase family protein, putative, expressed
OsAffx.15812.1.S1_at	0.00137158	3.0999	down	LOC_Os06g38120	low-affinity cation transporter, putative, expressed
Os.26811.1.A1_at	0.000476865	3.05508	down	LOC_Os06g39780	cytochrome P450, putative, expressed
Os.12843.1.S1_at	0.00172228	3.02198	down	LOC_Os03g22020	peroxidase precursor, putative, expressed
Os.459.1.S1_at	0.0126222	3.01582	down	LOC_Os03g46070	thaumatin, putative, expressed
Os.57406.1.S1_at	0.000975223	2.98112	down	LOC_Os05g20100	glycerol-3-phosphate acyltransferase, putative, expressed
Os.17659.1.S1_at	0.0299484	2.94275	down	LOC_Os12g15680	laccase precursor protein, putative, expressed
Os.15791.1.S1_at	0.000867475	2.92537	down	LOC_Os04g46140	transferase family protein, putative, expressed
Os.17912.2.S1_x_at	4.2986e-05	2.90796	down	LOC_Os01g23710	no apical meristem protein, putative, expressed
Os.12201.1.S1_at	0.000624896	2.85838	down	LOC_Os09g27750	1-aminocyclopropane-1-carboxylate oxidase 1, putative, expressed
OsAffx.5882.1.S1_at	0.00242791	2.84269	down	LOC_Os08g20486	transposon protein, putative, unclassified, expressed
Os.5809.1.S1_s_at	0.000102808	2.80434	down	LOC_Os11g46000	von Willebrand factor type A domain containing protein, putative, expressed
Os.14684.1.S1_at	0.000307484	2.78123	down	LOC_Os12g21784	expressed protein
Os.50858.1.S1_at	0.000944731	2.74053	down	LOC_Os02g47780	hydrolase, alpha/beta fold family domain containing protein, expressed
Os.46511.1.S1_at	0.00309977	2.70476	down	LOC_Os10g02840	O-methyltransferase, putative, expressed
Os.7150.1.S1_at	0.00562348	2.64916	down	LOC_Os09g31970	3-hydroxy-3-methylglutaryl-coenzyme A reductase, putative, expressed
OsAffx.25751.1.S1_at	0.0030566	2.60175	down	LOC_Os03g57980	LTPL99 - Protease inhibitor/seed storage/LTP family protein precursor, expressed
OsAffx.28335.1.S1_at	0.00413449	2.58408	down	LOC_Os07g07790	LTPL75 - Protease inhibitor/seed storage/LTP family protein precursor, expressed
Os.27215.1.A1_at	3.45118e-05	2.58318	down	LOC_Os09g17360	expressed protein
Os.7242.1.S1_at	0.0013559	2.55977	down	LOC_Os07g07930	LTPL78 - Protease inhibitor/seed storage/LTP family protein precursor, expressed
Os.51917.1.S1_at	0.00472226	2.55314	down	LOC_Os08g15920	expressed protein
Os.47854.1.S1_at	0.00654779	2.49673	down	LOC_Os02g46780	MYB family transcription factor, putative, expressed
Os.55961.1.S1_at	0.011824	2.46266	down	LOC_Os07g34280	CXE carboxylesterase, putative, expressed
OsAffx.28461.1.S1_at	0.000634805	2.4529	down	LOC_Os07g15500	expressed protein
Os.27702.2.A1_at	0.0019762	2.4319	down	LOC_Os09g10054	disease resistance protein RPS2, putative, expressed
Os.11862.2.S1_at	0.000419282	2.40446	down	LOC_Os03g52594	CCR4-NOT transcription factor, putative, expressed
Os.7281.1.S1_at	0.00606007	2.39474	down	LOC_Os01g68730	RNA-binding protein FUS, putative, expressed
Os.50365.1.S1_at	0.00407657	2.36291	down	LOC_Os04g51830	OsHKT1;4 - Na+ transporter, expressed
Os.26810.1.A1_s_at	0.020791	2.34315	down	LOC_Os02g16940	OsSub13 - Putative Subtilisin homologue, expressed
Os.54112.1.S1_at	1.02781e-05	2.3389	down	LOC_Os02g14929	T-complex protein, putative, expressed
Os.16036.1.S1_at	0.000173808	2.32957	down	LOC_Os11g09180	expressed protein
Os.31778.2.S1_at	0.00261472	2.31791	down	LOC_Os01g61610	flavonol synthase/flavanone 3-hydroxylase, putative, expressed
Os.55746.1.S1_at	0.00789302	2.31781	down	LOC_Os11g28530	terpene synthase, putative, expressed
Os.54472.1.S1_at	0.000128142	2.31741	down	LOC_Os07g32060	UDP-glucoronosyl/UDP-glucosyl transferase, putative, expressed
OsAffx.19953.7.S1_s_at	0.000294071	2.30847	down	LOC_Os12g34062	mitochondrial ribosomal protein S12, putative, expressed
Os.2321.1.S1_at	0.0247468	2.29806	down	LOC_Os08g09060	Cupin domain containing protein, expressed
Os.35204.1.S1_at	0.00100542	2.29764	down	LOC_Os07g13260	dof zinc finger domain containing protein, putative, expressed
Os.36684.1.S1_at	0.00144987	2.27847	down	LOC_Os02g43660	plastocyanin-like domain containing protein, putative, expressed
Os.26849.1.S1_at	0.00421435	2.25811	down	LOC_Os08g07100	terpene synthase, putative, expressed
Os.2081.1.S1_at	0.0199642	2.24866	down	LOC_Os01g19260	ATPase, putative, expressed
Os.55623.1.S1_at	0.0168145	2.242	down	LOC_Os08g42570	plant protein of unknown function domain containing protein, expressed
OsAffx.13994.1.S1_at	0.0349821	2.23803	down	LOC_Os04g27430	terpene synthase, putative, expressed
Os.7269.1.S1_s_at	0.00192982	2.22793	down	LOC_Os01g44960	hydrolase, alpha/beta fold family domain containing protein, expressed
Os.11625.1.S1_at	1.53853e-05	2.2075	down	LOC_Os08g27860	EARLY flowering protein, putative, expressed
OsAffx.30783.1.S1_at	0.000117391	2.18715	down	BGIOSGA034612	hypothetical protein
Os.9456.1.S1_at	0.00211071	2.16659	down	LOC_Os02g28170	transferase family protein, putative, expressed
Os.20593.2.S1_at	0.00128812	2.166	down	Os05g0327000	cyclin, putative, expressed
Os.53128.1.S1_at	0.00197209	2.16216	down	LOC_Os11g32410	expressed protein
OsAffx.2362.1.S1_s_at	0.00232982	2.1568	down	LOC_Os01g59000	cytochrome P450, putative, expressed
Os.15537.1.S1_at	0.0265467	2.1504	down	LOC_Os08g39660	cytochrome P450, putative, expressed
Os.6792.1.S1_at	0.0138629	2.14004	down	BGIOSGA033364	hypothetical protein
OsAffx.2593.1.S1_s_at	0.0107433	2.13075	down	LOC_Os02g13290	phosphoethanolamine/phosphocholine phosphatase, putative, expressed
Os.17211.1.S1_at	0.0115011	2.1052	down	LOC_Os02g15360	expressed protein
Os.14382.1.S1_at	0.0469792	2.10423	down	LOC_Os02g31860	expressed protein
Os.2320.1.S1_at	0.00852211	2.09969	down	LOC_Os08g09080	Cupin domain containing protein, expressed
Os.57091.1.S1_at	0.00913559	2.09398	down	LOC_Os08g01950	transferase family protein, putative, expressed
Os.9263.1.S1_at	0.000129114	2.09105	down	BGIOSGA020497	hypothetical protein
Os.51145.1.S1_at	0.0261038	2.0848	down	LOC_Os11g35930	chalcone synthase, putative, expressed
Os.14895.1.S1_at	0.0018369	2.0757	down	LOC_Os06g35560	reticuline oxidase-like protein precursor, putative, expressed
Os.50422.1.S1_at	0.0138848	2.06828	down	LOC_Os11g26950	UDP-glucoronosyl and UDP-glucosyl transferase domain containing protein, expressed
Os.9263.1.S1_s_at	0.000103805	2.06681	down	LOC_Os06g51410	OsPOP15 - Putative Prolyl Oligopeptidase homologue, expressed
Os.38099.1.S1_at	0.0173312	2.05999	down	LOC_Os03g61270	OsMan04 - Endo-Beta-Mannanase, expressed
Os.5111.1.S1_at	0.00814122	2.05675	down	LOC_Os10g21130	expressed protein
Os.4166.1.S1_at	0.000879269	2.04965	down	LOC_Os05g50380	glucose-1-phosphate adenylyltransferase large subunit, chloroplast precursor, putative, expressed
Os.7794.1.S1_at	0.000214361	2.04814	down	LOC_Os10g38489	glutathione S-transferase GSTU6, putative, expressed
Os.55823.1.S1_at	0.0114206	2.04362	down	LOC_Os12g24490	zinc finger, C3HC4 type domain containing protein, expressed
Os.57103.1.S1_at	0.00336453	2.03891	down	LOC_Os02g02930	terpene synthase, putative, expressed
Os.9660.1.S1_at	0.0337338	2.03389	down	LOC_Os09g23300	integral membrane protein, putative, expressed
Os.43596.1.S1_at	0.00639414	2.01348	down	LOC_Os01g10110	cytokinin dehydrogenase precursor, putative, expressed
OsAffx.29212.1.S1_at	0.00497219	2.00722	down	BGIOSGA027362	expressed protein
Os.55572.1.S1_at	0.0231066	2.00529	down	LOC_Os11g19490	expressed protein
Os.13008.1.S1_at	0.0157655	2.00259	down	LOC_Os08g39850	ipoxygenase, chloroplast precursor, putative, expressed
Os.54708.1.S1_at	0.00185501	2.00024	down	LOC_Os05g05180	OsGH3.6 - Probable indole-3-acetic acid-amido synthetase, expressed
